# Supplementary material for: The allometry of cellular DNA and ribosomal gene content among microbes and its use for the assessment of microbiome community structure
Source: Research Square preprint supplement (doi:10.21203/rs.3.rs-208798/v1), 2021-02-11
Supplement: Supplementary file 1 [file 6c9b4d793dee9311643eca62.xlsx]

## Sheet: Sheet1
Table S1. Taxon-specific values for primary variables (cell volume, ribosomal gene copies per cell, cellular DNA content and ploidy) as well as source variables (cell shape, cell axial dimension, ribosomal gene copies per genome and genome size) as used in the analyses presented in Fig. 1
Microorganism		Main Variables					Variables used for Calculations
	Mean Cell volume	16/18S gene copies	DNA content	Mean Ploidy		Cell shape	Cell axial	16/18S RNA copies	Genome Size
	( Vc; µm3)	per cell (Rc)	(pg/cell)	(P)		approximation	dimensions (µm)	per genome (Rg)	(Mbp)
Pelagibacter ubique	0.037	1	0.00132924	1		rod-sickle shape	N.A.	1	1.3
Mycoplasma gallisepticum	0.018	2	0.00103272	1		sphere	N.A.	2	1.01
Prochlorococcus marinus	0.122522	1	0.00285276	1		sphere	0.6	1	2.79
Bdellovibrio bacteriovorus	0.168861	2	0.00386503	1		prolate spheroid	1.5 / 0.35	2	3.78
Aeropyrum pernix	0.395841	1	0.00170757	1		sphere	0.9	1	1.67
Pyrobaculum aerophilum	1.41372	2	0.00453988	2		rod	5 / 0.6	1	2.22
Sulfolobus acidocaldarius	0.395841	2	0.00453988	2		sphere	0.9	1	2.22
Wolinella succinogenes	2.55254	3	0.00215746	1		rod	4 /0.75	3	2.11
Neisseria gonorrhoeae	0.318348	12	0.00659509	3		sphere	0.8	4	2.15
Neisseria lactamica	0.0654498	4	0.00226994	1		sphere	0.5	4	2.22
Thermus thermophilus HB8	0.589049	8	0.00867076	4		rod	3 /0.5	2	2.12
Vibrio cholerae	0.357325	198	0.0915542	22		rod-sickle shape	3.1 / 0.38	9	4.07
Neisseria meningitidis	0.940122	16	0.00928425	4		sphere	1.05	4	2.27
Caulobacter crescentus	0.664447	4	0.00820041	2		rod-sickle shape	2.35 / 0.6	2	4.01
Escherichia coli	0.6	7	0.00514315	1		rod	N.A.	7	5.03
Synechococcus sp. WH 8101	0.909229	2	0.00327198	1		sphere	1.15	2	3.2
Bacillus subtilis	0.9	9	0.00431493	1		rod	N.A.	9	4.22
Halobacterium salinarium	1	20	0.0525562	20		prolate spheroid	N.A.	1	2.57
Methanocaldococcus jannaschii	1.14537	16	0.0142331	8		sphere	1.25	2	1.74
Borrelia hermsii	1.36136	16	0.0227403	16		prolate spheroid	12.5 / 0.35	1	1.39
Thermococcus kodakarensis	1.76715	13	0.0277546	13		sphere	1.5	1	2.088
Synechococcus elongatus pcc 7942	2.3	8	0.0114519	4		rod plus half spheres	N.A.	2	2.8
Deinococcus radiodurans	2.7	18	0.0201227	6		sphere	N.A.	3	3.28
Azotobacter vindelandii	5.3	132	0.105726	22		sphere	N.A.	6	4.7
Methanosarcina acetivorans	6.37063	30	0.0587935	10		sphere	2.3	3	5.75
Synechocystis sp. PCC 6803 (‘Kazusa’)	7	24	0.0441718	12		sphere	N.A.	2	3.6
Haloferax volcanii	11.3883	28	0.0574029	14		rod	2.5; 2	2	4.01
Desulfovibrio gigas	11.6632	52	0.0478528	13		rod-sickle shape	7.5 / 1.3	4	3.6
Buchnera sp.	18.8496	120	0.0809816	120		sphere	3	1	0.66
Nostoc sp. PCC 7120	16.6	32	0.0588957	8		prolate spheroid	N.A.	4	7.2
Anabaena sp. Mbd320	25.7	40.8	0.075092	10.2		prolate spheroid	N.A.	4	7.2
Anabaena variabilis	48	28	0.050818	7		prolate spheroid	N.A.	4	7.1
Azotobacter chroococcum	187	138	0.122055	23		prolate spheroid	N.A.	6	5.19
Anabaena cylindrica	316	100	0.18047	25		rod	N.A.	4	7.06
Epulopiscium fishelsoni	413643	368000	167.5	43109.2		prolate spheroid	250 / 55	8.53646	3.8
Thiomargarita namibiensis	396504	18000	141.902	18000		sphere	450 / 1.25	1	7.71
Pseudomonas putida	2.0944	140	0.12638	20		rod plus half spheres	2.0 / 1.0	7	6.18
Methanococcus maripaludis	1.5	126	0.0760123	42		sphere	N.A.	3	1.77
Bacillus megatherium	7.95216	156	0.0705521	12		rod	N.A.	13	5.75
Streptococcus pneumoniae	0.544052	8	0.00421268	2		sphere	N.A.	4	2.06
Salmonella typhimurium	0.63	28	0.0202454	4		rod	N.A.	7	4.95
Staphylococcus aureus	0.52	6	0.00288344	1		sphere	N.A.	6	2.82
Lactococcus lactis	0.598212	12	0.00513292	2		prolate spheroid	N.A.	6	2.51
Corynebacterium glutamicum	0.481056	12	0.00666667	2		rod	N.A.	6	3.26
Paenibacillus sp	0.879646	30	0.0214724	3		rod	N.A.	10	7
Saccharomyces cerevisiae	86	450	0.0248611	3		prolate spheroid	N.A.	150	12.1571
Entamoeba histolytica	2356.19	44	0.539877	22		sphere	15	2	24
Trypanosoma brucei	58.8	30	2.66871	2		elongated body	N.A.	15	26.1
Giardia muris	519	730	0.059816	10		pear shape	N.A.	73	11.7
Acanthamoeba castellanii	4352.41	50	1.07362	25		sphere	17.5	2	42
Naegleria gruberi	808.175	16	0.503067	4		sphere	10.5	4	41
Bathycoccus prasinos	1.76715	12	0.184908	12		sphere	1.5	1	15.07
Chlamydomonas concordia	179.594	450	N.A.	N.A.		sphere	7	N.A.	N.A.
Micromonas pusilla	1.04565	5	0.11227	5		prolate spheroid	1.5	1	21.96
Ostreococcus tauri	0.268083	4	0.0603681	4		sphere	0.8	1	14.76
Prasinococcus capsulatus	14.1372	2	N.A.	N.A.		sphere	3	N.A.	N.A.
Tetraselmis sp.	119.148	34	7.92464	34		prolate spheroid	8	1	227.95
Epistylis sp.	52746.6	76513	N.A.	N.A.		cone+half sphere	145	N.A.	N.A.
Favella sp.	2.41731e+06	46498	N.A.	N.A.		rod	220	N.A.	N.A.
Pseudotontonia sp.	105721	172889	N.A.	N.A.		cone+half sphere	120	N.A.	N.A.
Tintinnopsis sp.	1.27165e+06	126372	N.A.	N.A.		rod	195	N.A.	N.A.
Strombidinopsis sp.	523599	30247	N.A.	N.A.		sphere	100	N.A.	N.A.
Strombidium sp.	25639.4	34647	932.245	8661.75		cone+half sphere	45	4	105.26
Vorticella sp.	117993	160000	N.A.	N.A.		cone+half sphere	100	N.A.	N.A.
Vorticella sp.1	136591	161355	N.A.	N.A.		cone+half sphere	105	N.A.	N.A.
Vorticella sp.2	136591	315786	N.A.	N.A.		cone+half sphere	105	N.A.	N.A.
Vorticella sp.3	117993	99376	N.A.	N.A.		cone+half sphere	100	N.A.	N.A.
Vorticella sp.4	117993	61226	N.A.	N.A.		cone+half sphere	100	N.A.	N.A.
Vorticella sp.5	117993	82194	N.A.	N.A.		cone+half sphere	100	N.A.	N.A.
Zoothamnium sp.1	6928.8	40675	N.A.	N.A.		prolate spheroid	35	N.A.	N.A.
Zoothamnium sp.2	6928.8	3385	N.A.	N.A.		prolate spheroid	35	N.A.	N.A.
Sphaerozoum sp	1.15035e+06	70556	N.A.	N.A.		sphere	130	N.A.	N.A.
Sphaerozoum fuscum	676750	26189.4	N.A.	N.A.		sphere	108.4	N.A.	N.A.
Collozoum pelagicum	282267	45534.3	N.A.	N.A.		sphere	81	N.A.	N.A.
Coscinodiscus wailesii	4.18879e+06	33689	N.A.	N.A.		disk	200	N.A.	N.A.
Cylindrotheca closterium	2362.19	484	N.A.	N.A.		rod	67	N.A.	N.A.
Ditylum brightwellii	16963.2	36896	N.A.	N.A.		rod	69	N.A.	N.A.
Microorganism		Main Variables					Variables used for Calculations
	Mean Cell volume	16/18S gene copies	DNA content	Mean Ploidy		Cell shape	Cell axial	16/18S RNA copies	Genome Size
	( Vc; µm3)	per cell (Rc)	(pg/cell)	(P)		approximation	dimensions (µm)	per genome (Rg)	(Mbp)
Extubocellulus spinifer	8.04248	150	N.A.	N.A.		rod	4	N.A.	N.A.
Nitzschia closterium	32.0571	199	N.A.	N.A.		rod	20	N.A.	N.A.
Phaeodactylum tricornicum	169.646	88	N.A.	N.A.		rod	24	N.A.	N.A.
Skeletonema marinoi	223.654	61	N.A.	N.A.		disk	9	N.A.	N.A.
Thalassioria sp.	1352.41	636	N.A.	N.A.		disk	15	N.A.	N.A.
Thalassioria weisflogii	217.562	49	N.A.	N.A.		rod	10	N.A.	N.A.
Mesopedinella arctica	268.083	33	N.A.	N.A.		sphere	8	N.A.	N.A.
Akashiwo sanguineum	29088.8	30545	N.A.	N.A.		prolate spheroid	50	N.A.	N.A.
Alexandrium andersonii	6370.63	1603	N.A.	N.A.		sphere	23	N.A.	N.A.
Amphidinium carterae	1045.65	840	N.A.	N.A.		prolate spheroid	15	N.A.	N.A.
Gymnodinium chlorophorum	2572.44	1673	N.A.	N.A.		sphere	17	N.A.	N.A.
Heterocapsa triquetra	1108.45	4872	N.A.	N.A.		prolate spheroid	19	N.A.	N.A.
Lingulodinium polyedrum	28730.9	12812	N.A.	N.A.		sphere	38	N.A.	N.A.
Peridinium faeroense	11494	1057	N.A.	N.A.		sphere	28	N.A.	N.A.
Prorocentrum micans	13535.3	4996	N.A.	N.A.		cone+half sphere	49	N.A.	N.A.
Prorocentrum minimum	4188.79	1432	21.4873	716		sphere	20	2	29.35
Prorocentrum nux	523.599	143	N.A.	N.A.		sphere	10	N.A.	N.A.
Prorocentrum lima	17241.1	10086	N.A.	N.A.		prolate spheroid	42	N.A.	N.A.
Protoceratium reticulatum	22449.3	6644	N.A.	N.A.		sphere	35	N.A.	N.A.
Scrippsiella trochoidea	11494	4112	N.A.	N.A.		sphere	28	N.A.	N.A.
Allogromia laticollaris	2.80616e+06	35000	N.A.	N.A.		sphere	175	N.A.	N.A.
Bolivina variabilis	2.80616e+06	7500	N.A.	N.A.		cone+half sphere	175	N.A.	N.A.
Rosalina sp.	2.80616e+06	10000	N.A.	N.A.		sphere	175	N.A.	N.A.
Emiliania huxleyi	14.1372	4	0.342904	2		sphere	3	2	167.68
Rhodomonas salina	83.7758	204	N.A.	N.A.		prolate spheroid	10	N.A.	N.A.
Nannochloropsis salina	4.18879	1	0.0283845	1		sphere	2	1	27.76
Oxytricha nova	261412	100000	N.A.	N.A.		prolate spheroid	150	N.A.	N.A.
Tetrahymena thermophila	11362.8	9000	N.A.	N.A.		prolate spheroid	50	N.A.	N.A.
Stylonychia lemnae	1.10601e+06	200000	11188.1	200000		prolate spheroid	230	1	54.71
MAST-4	8.18123	30	N.A.	N.A.		sphere	2.5	N.A.	N.A.
NOTES
Codes	calculated from other variables		directly reported in source
Sources for reported values of Rc:	SI Refs. 1-12
Sources for reported values of Vc	SI Refs. 13-28
Sources for reported values of P	SI Refs. 29--52
Sources for reported values of Rg	SI Refs. 53-56
